# Supplementary material for: Effect of pomelo seed-derived carbon on the performance of supercapacitors
Source: Royal Society of Chemistry journal article supplement (doi:10.1039/d0na00778a), 2021-01-01
Supplement: d0na00778a1.pdf [file d0na00778a1.pdf]

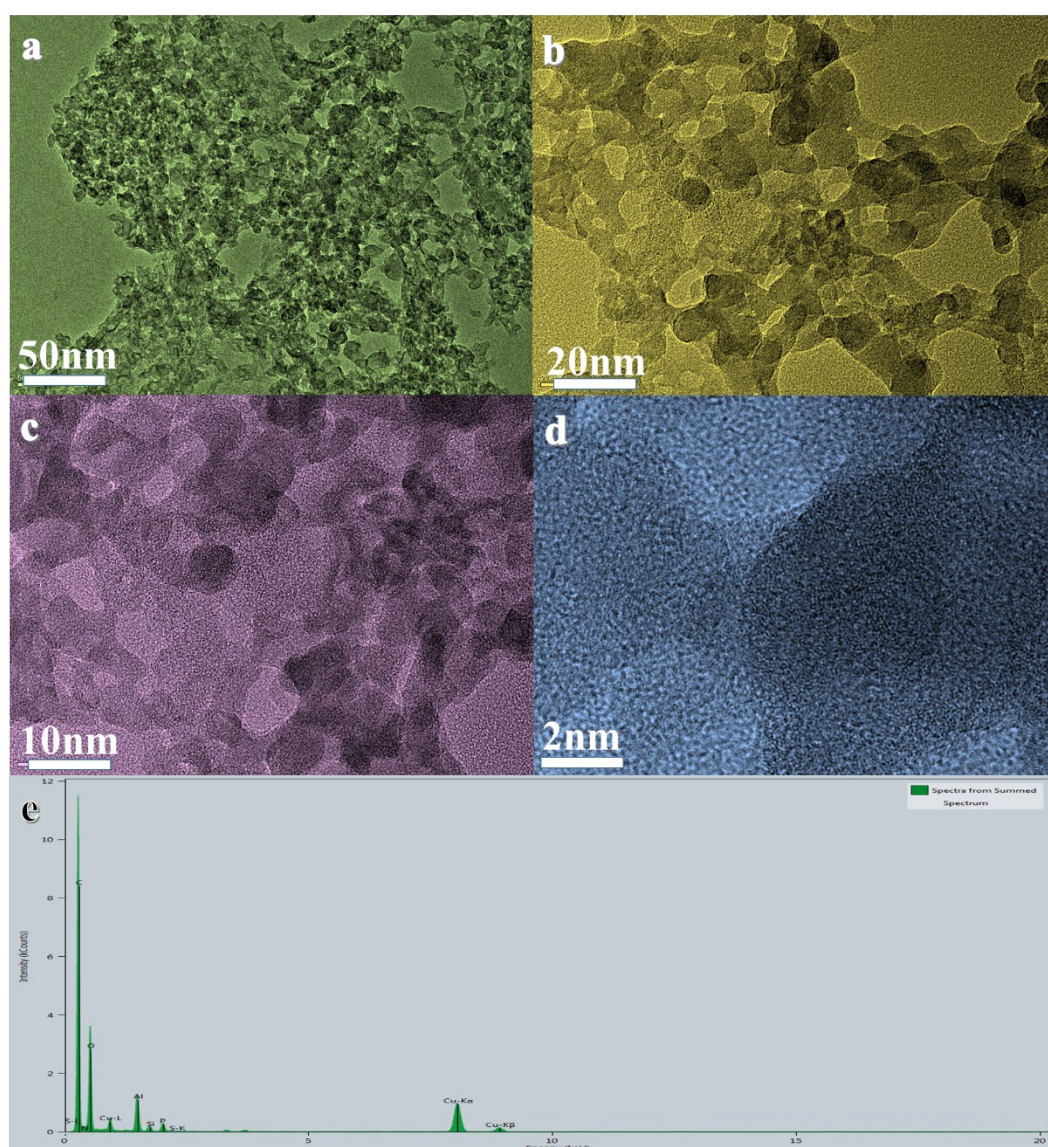

Figure S1 HRTEM and EDX images of PSAC-3

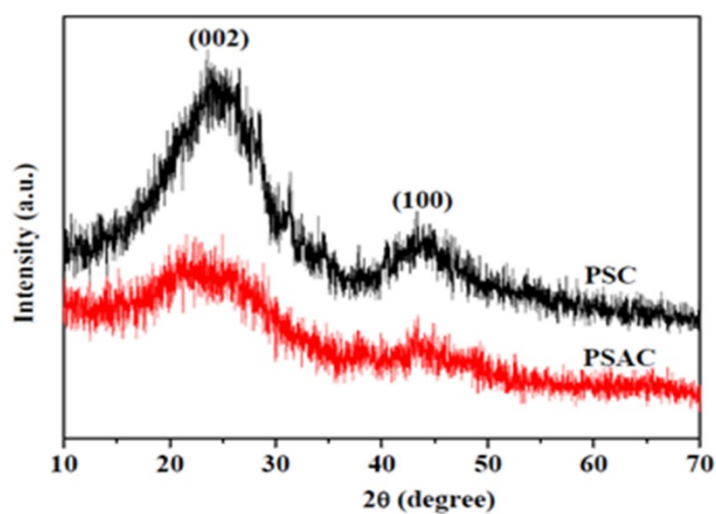

Figure S2 XRD patterns of PSC and PSAC-3

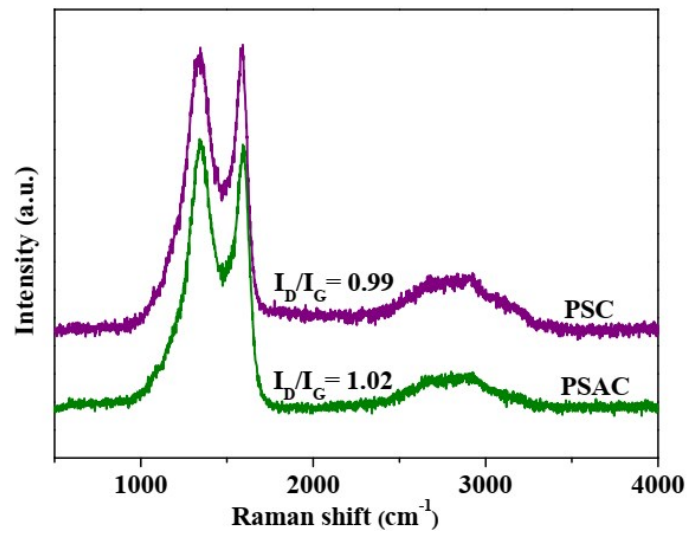

Figure S3 Raman spectrum of PSC and PSAC-3.

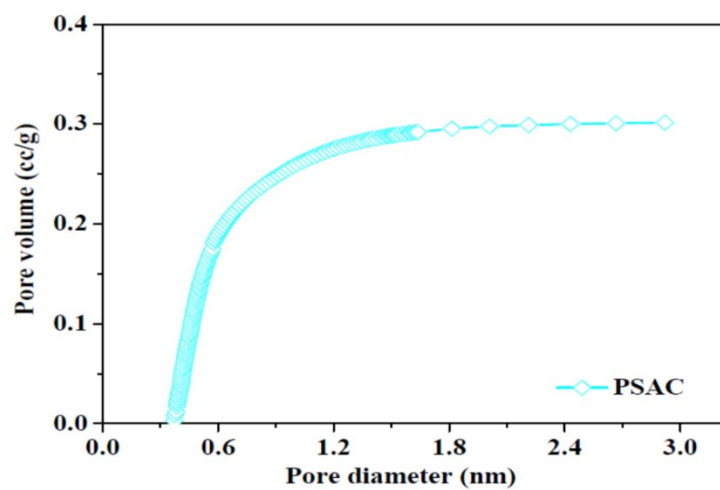

Figure S4 The pore size distribution of PSAC-3

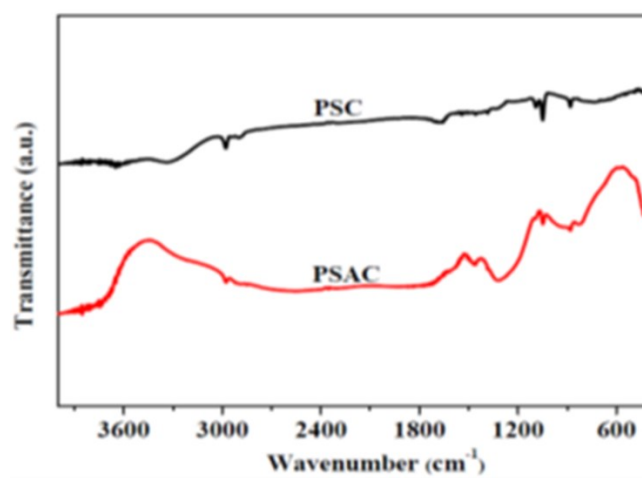

Figure S5 FT-IR spectra of PSC and PSAC-3

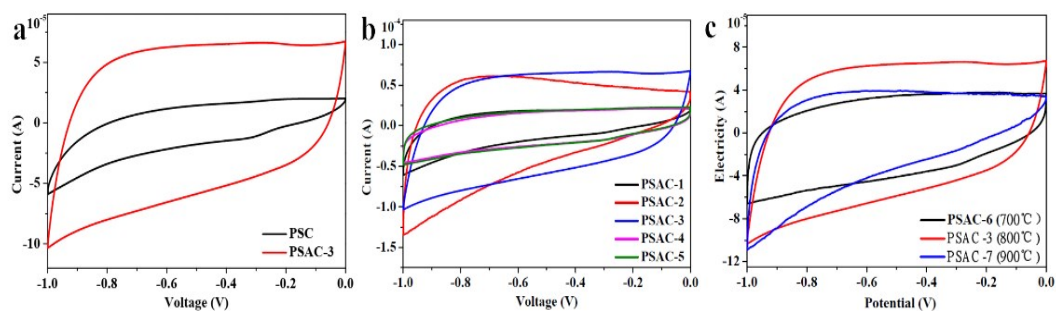

Figure S6 (a) CV curves of PSC and PSAC-3 at the scan rates of  $100 \text{ mV s}^{-1}$ . (b) CV curves of PSAC samples prepared with different mass ratio of precursor/KOH at the scan rates of  $100 \text{ mV s}^{-1}$ . (c) CV curves of PSAC samples prepared under different temperature at the scan rates of  $100 \text{ mV s}^{-1}$ .

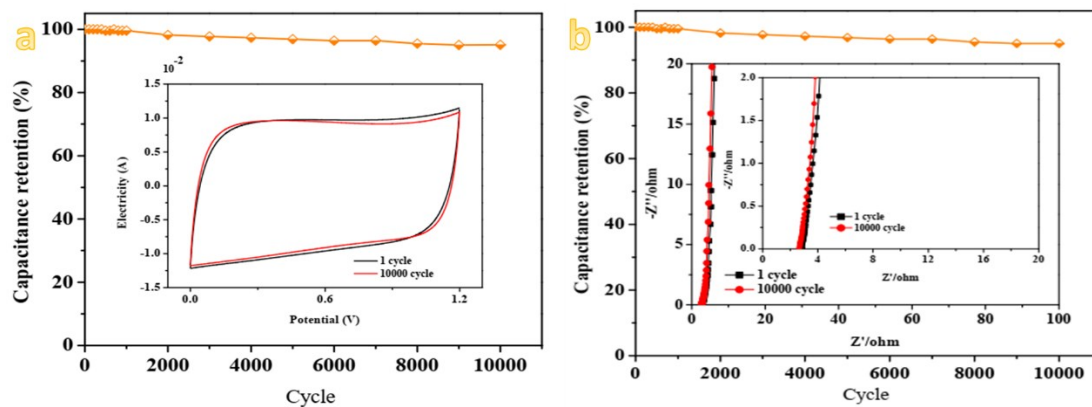

Figure S7 (a) Cycle performance of the PSAC symmetrical supercapacitor at  $10 \text{ A g}^{-1}$  (insert photograph of CV curves for recycling); (b) Cycle performance of the PSAC symmetrical supercapacitor at  $10 \text{ A g}^{-1}$  (insert photograph of Nyquist plots for recycling)
